# Supplementary material for: SMG-1 and mTORC1 Act Antagonistically to Regulate Response to Injury and Growth in Planarians
Source: PLoS Genet. 2012 Mar 29;8(3):e1002619. doi: 10.1371/journal.pgen.1002619 (PMC3315482; doi:10.1371/journal.pgen.1002619)

**A**

| RNAi phenotype             | 33d- <i>GFP</i> | 9d- <i>Smed-smg-1</i> | 22d- <i>Smed-smg-1</i> | 33d- <i>Smed-smg-1</i> |
|----------------------------|-----------------|-----------------------|------------------------|------------------------|
| Normal                     | 100% (84/84)    | 20.24% (17/84)        |                        |                        |
| Hyperplasia                |                 | 34.52% (29/84)        | 7.14% (6/84)           |                        |
| Hyperplasia and outgrowths |                 | 35.71% (30/84)        | 61.90% (52/84)         |                        |
| Dead after outgrowths      |                 | 9.52% (8/84)          | 30.95% (26/84)         | 100% (87/87)           |

**B**

| Trunks 25dR                                                   | <i>Control RNAi</i> | <i>Smed-smg-1 RNAi</i> |
|---------------------------------------------------------------|---------------------|------------------------|
| Normal                                                        | 100% (75/75)        | 8% (6/75)              |
| Abnormal unpigmented blastemas with or without hyperplasia    |                     | 38.67% (29/75)         |
| Abnormal unpigmented blastemas, hyperplasia and/or outgrowths |                     | 9.33% (7/75)           |
| Dead after outgrowths                                         |                     | 44% (33/75)            |

**C**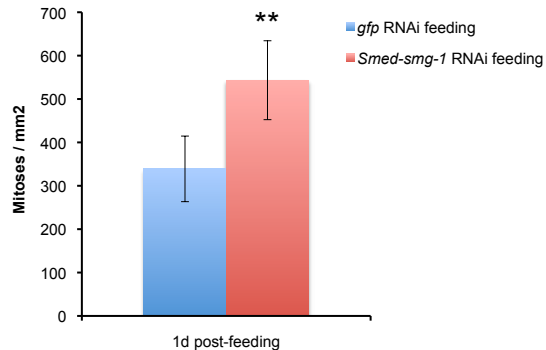

Supplement: Figure S10 — Smed-smg-1 restricts the mitotic response to feeding. A, B. Tables show Smed-smg-1(RNAi) feeding phenotype progression compared to controls. d are days after the last injection. A. Homeostasis phenotypes. B. Phenotypes in trunks at 25 d of regeneration. C. Number of H3P positive cells per mm2 in control and Smed-smg-1 RNAi planarians 1 d after feeding the corresponding dsRNAs. Error bars are s.d from the mean, the asterisks indicate P<0.01 using two-tailed Student's test with equal sample variance relative to the controls. n≥5. (PDF) [file pgen.1002619.s010.pdf]
