# Supplementary material for: SMG-1 and mTORC1 Act Antagonistically to Regulate Response to Injury and Growth in Planarians
Source: PubMed Central journal article supplement (PMC3315482; doi:10.1371/journal.pgen.1002619), 2012-03-29

# González-Estévez\_Fig. S6

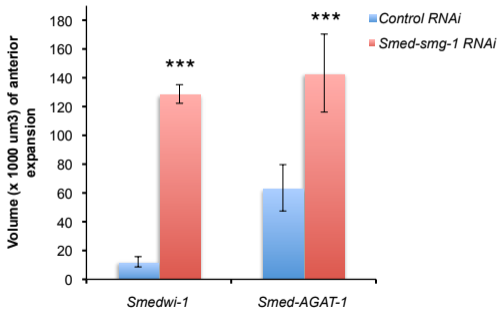

Supplement: pgen.1002619.s006.pdf [file pgen.1002619.s006.pdf]
