# Supplementary material for: SMG-1 and mTORC1 Act Antagonistically to Regulate Response to Injury and Growth in Planarians
Source: PubMed Central journal article supplement (PMC3315482; doi:10.1371/journal.pgen.1002619), 2012-03-29

**A***Smed-riCTOR***E value vs Human****4 e -42***Smed-sin1***E value vs Human****4 e -17****B**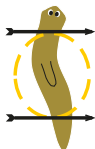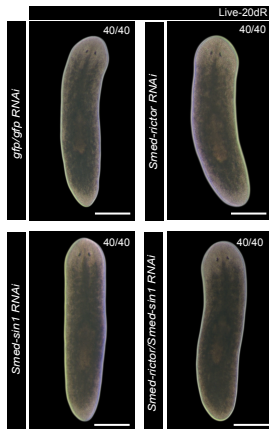

González-Estévez\_Fig. S13

**C**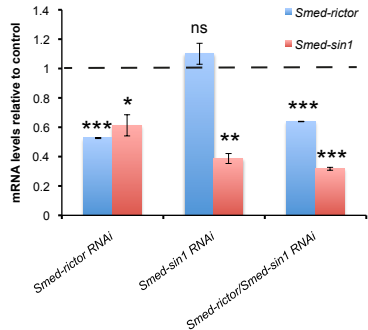

Supplement: pgen.1002619.s013.pdf [file pgen.1002619.s013.pdf]
