# Supplementary material for: SMG-1 and mTORC1 Act Antagonistically to Regulate Response to Injury and Growth in Planarians
Source: PubMed Central journal article supplement (PMC3315482; doi:10.1371/journal.pgen.1002619), 2012-03-29
Supplement: pgen.1002619.s014.pdf [file pgen.1002619.s014.pdf]

| Terminals                             | Accession Numbers | Terminals                               | Accession Numbers |
|---------------------------------------|-------------------|-----------------------------------------|-------------------|
| SMG-1 <i>Homo sapiens</i>             | NP_055907.3       | ATM <i>Harpegnathos saltator</i>        | EFN88218.1        |
| SMG-1 <i>Pan troglodytes</i>          | XP_001152224.1    | ATM <i>Aedes aegypti</i>                | XP_001649972.1    |
| SMG-1 <i>Canis familiaris</i>         | XP_851552.1       | ATM <i>Branchiostoma floridae</i>       | ACG68443.1        |
| SMG-1 <i>Bos taurus</i>               | XP_603490.3       | ATM <i>Stronylocentrotus purpuratus</i> | NP_001107666.1    |
| SMG-1 <i>Mus musculus</i>             | NP_001026984.1    | ATM <i>Daphnia pulex</i>                | EFX88021.1        |
| SMG-1 <i>Gallus gallus</i>            | XP_414907.2       | ATM <i>Nematostella vectensis</i>       | XP_001628467.1    |
| SMG-1 <i>Danio rerio</i>              | NP_001073513.2    | ATM <i>Trichoplax adhaerens</i>         | XP_002118267.1    |
| SMG-1 <i>Ailuropoda melanoleuca</i>   | XP_002920515.1    | ATM <i>Tribolium castaneum</i>          | EFA11787.1        |
| SMG-1 <i>Xenopus tropicalis</i>       | XP_002932267.1    | ATM <i>Schizosaccharomyces pombe</i>    | NP_588126.1       |
| SMG-1 <i>Tribolium castaneum</i>      | XP_969532.1       | ATM <i>Schistosoma mansoni</i>          | XP_002577847      |
| SMG-1 <i>Nematostella vectensis</i>   | XP_001640500.1    | TRRAP <i>Homo sapiens</i>               | NP_003487.1       |
| SMG-1 <i>Branchiostoma floridae</i>   | XP_002607176.1    | TRRAP <i>Pan troglodytes</i>            | XP_001136894.1    |
| SMG-1 <i>Camponotus floridanus</i>    | EFN74897.1        | TRRAP <i>Canis familiaris</i>           | XP_860949.1       |
| SMG-1 <i>Solenopsis invicta</i>       | EFZ20104.1        | TRRAP <i>Bos taurus</i>                 | XP_583735.3       |
| SMG-1 <i>Apis mellifera</i>           | XP_001122895.1    | TRRAP <i>Mus musculus</i>               | NP_001074831.1    |
| SMG-1 <i>Acyrtosiphon pisum</i>       | XP_001947123.1    | TRRAP <i>Rattus norvegicus</i>          | XP_213706.4       |
| SMG-1 <i>Drosophila virilis</i>       | XP_002057072.1    | TRRAP <i>Gallus gallus</i>              | XP_414752.2       |
| SMG-1 <i>Trichoplax adhaerens</i>     | XP_002116869.1    | TRRAP <i>Danio rerio</i>                | XP_001919276.2    |
| SMG-1 <i>Daphnia pulex</i>            | EFX69271.1        | TRRAP <i>Drosophila melanogaster</i>    | NP_001097192.1    |
| SMG-1 <i>Schistosoma mansoni</i>      | XP_002575156.1    | TRRAP <i>Anopheles gambiae</i>          | XP_556172.2       |
| SMG-1 <i>Ixodes scapularis</i>        | XP_002414133.1    | TRRAP <i>Saccharomyces cerevisiae</i>   | NP_011967.1       |
| TOR <i>Homo sapiens</i>               | NP_004949.1       | TRRAP <i>Daphnia pulex</i>              | EFX90201.1        |
| TOR <i>Mus musculus</i>               | NP_064393.1       | TRRAP <i>Tribolium castaneum</i>        | EFA05277.1        |
| TOR <i>Danio rerio</i>                | NP_001070679.2    | DNA-PK <i>Homo sapiens</i>              | P78527.3          |
| TOR <i>Drosophila melanogaster</i>    | NP_524891.1       |                                         |                   |
| TOR <i>Anopheles gambiae</i>          | XP_317619.2       |                                         |                   |
| TOR <i>Branchiostoma floridae</i>     | EEA56493.1        |                                         |                   |
| TOR <i>Apis mellifera</i>             | XP_625130.1       |                                         |                   |
| TOR <i>Tribolium castaneum</i>        | XP_971819.1       |                                         |                   |
| TOR <i>Acyrtosiphon pisum</i>         | XP_001948118.1    |                                         |                   |
| TOR <i>Trichoplax adhaerens</i>       | XP_002113370.1    |                                         |                   |
| TOR <i>Aedes aegypti</i>              | XP_001650255.1    |                                         |                   |
| TOR <i>Nematostella vectensis</i>     | XP_001637040.1    |                                         |                   |
| TOR1 <i>Saccharomyces cerevisiae</i>  | CAA52849.1        |                                         |                   |
| TOR2 <i>Saccharomyces cerevisiae</i>  | NP_012719.2       |                                         |                   |
| TOR <i>Schistosoma mansoni</i>        | XP_002571630.1    |                                         |                   |
| ATR <i>Homo sapiens</i>               | NP_001175.2       |                                         |                   |
| ATR <i>Danio rerio</i>                | XP_696163.4       |                                         |                   |
| ATR <i>Schistosoma mansoni</i>        | XP_002578622.1    |                                         |                   |
| ATR <i>Trichoplax adhaerens</i>       | XP_002110572.1    |                                         |                   |
| ATR <i>Daphnia pulex</i>              | EFX77801.1        |                                         |                   |
| ATR <i>Branchiostoma floridae</i>     | XP_002594547.1    |                                         |                   |
| ATR <i>Tribolium castaneum</i>        | EFA09227.1        |                                         |                   |
| ATR <i>Drosophila melanogaster</i>    | AAC46881.1        |                                         |                   |
| RAD3 <i>Schizosaccharomyces pombe</i> | NP_595357.1       |                                         |                   |
| MEC1P <i>Saccharomyces cerevisiae</i> | NP_009694.1       |                                         |                   |
| ATM <i>Homo sapiens</i>               | NP_000042.3       |                                         |                   |
| Tel1p <i>Saccharomyces cerevisiae</i> | AAA69802.1        |                                         |                   |
| ATM <i>Bruqia malayi</i>              | XP_001899536.1    |                                         |                   |
